# Supplementary material for: Validation of a Novel Patient-Reported Measure of The Burden of Digital Care in Diabetes
Source: Research Square preprint supplement (doi:10.21203/rs.3.rs-7265768/v1), 2025-08-20
Supplement: Supplementary file 3 [file b69d06e2291b0b3c7a8f1500.pdf]

## **Additional file 1. Digital medicine tools**

**Digital medicine tools** refer to devices or applications that support the monitoring, self-management, or treatment of diabetes through digital technology.

In this study, examples include:

**Glucometer:** A handheld device used to measure blood glucose levels using test strips. Often includes memory storage or connectivity features.

**Continuous Glucose Monitor (CGM):** A wearable device that continuously measures glucose levels in interstitial fluid and provides real-time data via connected apps or devices.

**Insulin Smartpens:** Insulin delivery pens with built-in memory or Bluetooth connectivity that track dose and timing and may sync with apps or clinician portals.

**Insulin Pumps:** Portable devices that deliver insulin continuously through a catheter, often programmable and increasingly integrated with glucose monitoring data.

**Sensor-Enhanced Pumps / Automated Insulin Delivery (AID) Systems:** Systems combining CGMs with insulin pumps to automate insulin delivery based on real-time glucose data (e.g., hybrid closed-loop systems).

**Mobile Apps:** Smartphone or tablet applications used for tracking glucose, meals, medications, activity, or symptoms. Some also enable data sharing with clinicians.

**Patient Portals:** Secure digital platforms allowing patients to view lab results, communicate with providers, schedule appointments, and access educational materials.

**Telemedicine Platforms:** Video or messaging systems used for remote diabetes consultations and care management.

**Digital Blood Pressure Monitors:** Automated cuffs that digitally measure and store blood pressure readings, often with app connectivity.

**Smart Scales:** Scales that measure weight and body composition metrics and sync with mobile apps or clinician portals.
