# Supplementary material for: Validation of a Novel Patient-Reported Measure of The Burden of Digital Care in Diabetes
Source: Research Square preprint supplement (doi:10.21203/rs.3.rs-7265768/v1), 2025-08-20
Supplement: Supplementary file 4 [file e3728a50ffa96420f320a310.pdf]

**Additional file 3. Frequency of "Does Not Apply" Responses and Missing Data for Each TBQ+D Item**

|                                                                                                                                                          | Does not apply: N (%) | Missing |
|----------------------------------------------------------------------------------------------------------------------------------------------------------|-----------------------|---------|
| How much of a problem is the taste, shape, or size of your pills?                                                                                        | 66 (22.1%)            | 1       |
| How much of a problem are the annoyances caused by your injections?                                                                                      | 32 (10.7%)            | 0       |
| How much of a problem is the number of times that you should take your medication daily?                                                                 | 13 (4.4%)             | 1       |
| How much of a problem are the efforts you make to help you remember to take your medications                                                             | 6 (2.0%)              | 2       |
| How much of a problem is it to take the necessary precautions when taking your medication?                                                               | 8 (2.7%)              | 1       |
| How much of a problem is it to arrange medical appointments?                                                                                             | 2 (0.7%)              | 1       |
| How much of a problem is it to attend doctor visits and other office visits: given their frequency and time spent participating in them?                 | 3 (1.0%)              | 2       |
| How much of a problem is it to complete lab tests and other exams: given their frequency, time spent and associated nuisances or inconveniences?         | 4 (0.3%)              | 4       |
| How much of a problem are the difficulties you have in your relationships with healthcare professionals?                                                 | 1 (0.3%)              | 4       |
| How much of a problem is the time and effort required for self-monitoring: given their frequency, time spent and associated nuisances or inconveniences? | 14 (4.7%)             | 4       |
| How much of a problem is the administrative burden related to healthcare?                                                                                | 3 (1.0%)              | 6       |
| How much of a problem is the financial burden associated with your healthcare?                                                                           | 4 (1.3%)              | 2       |
| How much of a problem is it to make changes in eating and other habits?                                                                                  | 3 (1.0%)              | 3       |
| How much of a problem is it to follow doctors' recommendations to practice physical activity?                                                            | 2 (0.7%)              | 1       |

|                                                                                                                             |                |                                             |
|-----------------------------------------------------------------------------------------------------------------------------|----------------|---------------------------------------------|
| How much of a problem is how your healthcare affects your relationships with others?                                        | 4 (1.4%)       | 4                                           |
| How much of a problem is it to manage your health discretely?                                                               | 7 (2.4%)       | 3                                           |
| How much of a problem is the privacy and security of your health information?                                               | 4 (1.4%)       | 5                                           |
| The need for healthcare on a regular basis reminds me of my health problems'.                                               | 0              | 3                                           |
| Do you use digital devices as part of your health management?                                                               | No = 26 (8.7%) | 5 people did not answer screening question. |
|                                                                                                                             | N=269 pts      |                                             |
| How much of a problem is the time and effort required to take care of and use your digital devices in your day-to-day life? | 3 (1.1%)       | 4                                           |
| How much of a problem is the annoyance and discomfort of your digital devices?                                              | 6 (2.2%)       | 1                                           |
| How much of a problem is the time and effort required to solve problems with your digital devices?                          | 6 (2.2%)       | 3                                           |
| How much of a problem is it to take the necessary precautions when using your digital devices?                              | 5 (1.9%)       | 0                                           |
| How much of a problem is it to give control of your health to digital devices?                                              | 8 (3.0%)       | 0                                           |
| The need for digital devices (including their visibility) on a regular basis reminds me of my health problems.              | 0              | 0                                           |
