# Supplementary figures and images for: Validation of a Novel Patient-Reported Measure of The Burden of Digital Care in Diabetes
Source: Research Square preprint supplement (doi:10.21203/rs.3.rs-7265768/v1), 2025-08-20

## Additional file 2. Digital Medicine Tools Intensity Scale

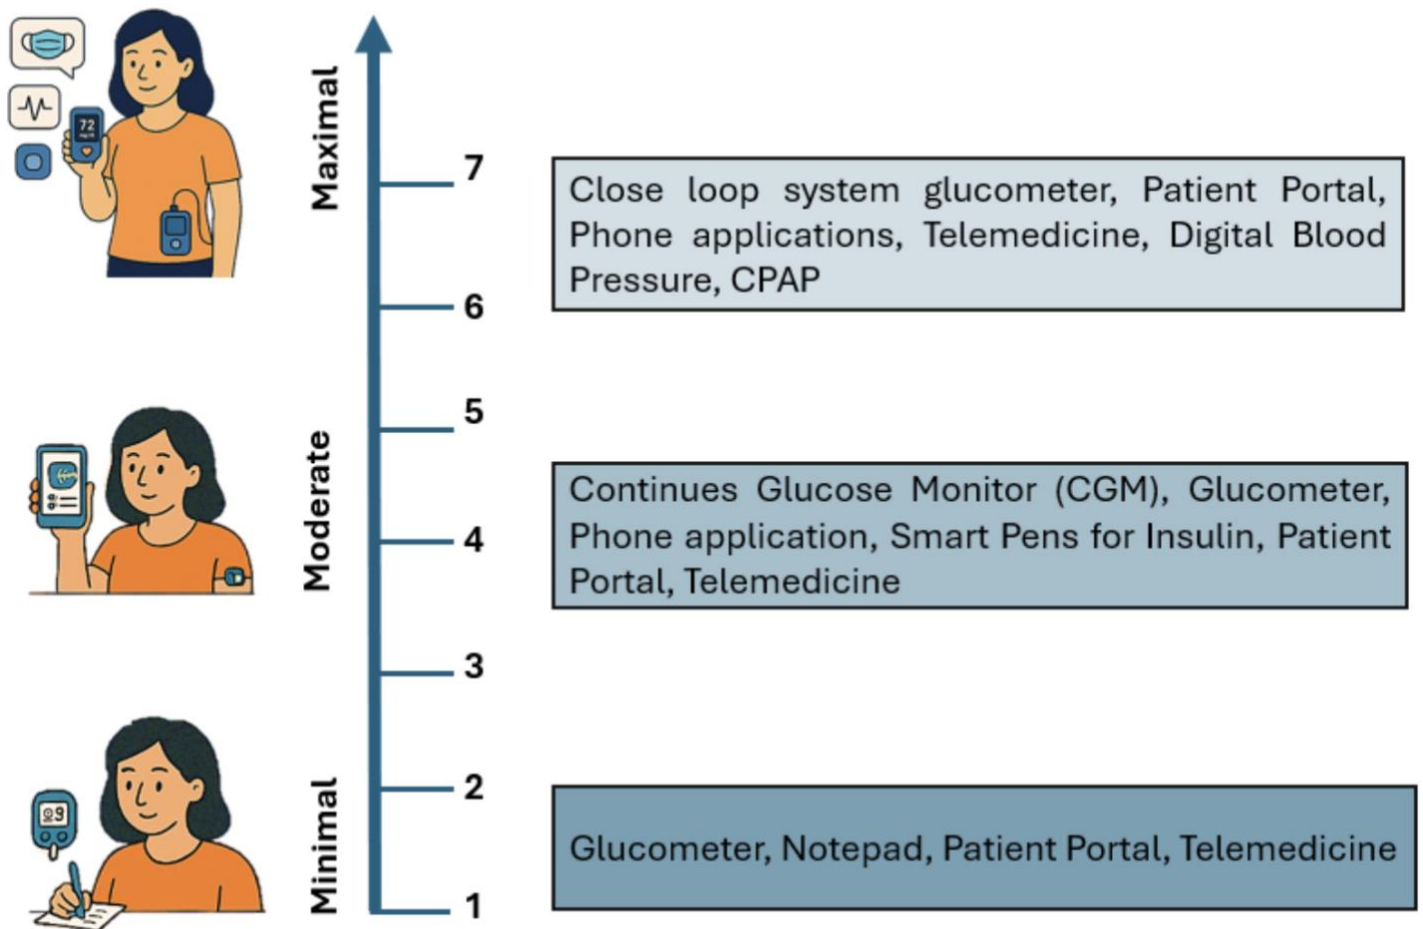

Supplement: Supplementary file 1 [file 2e138daee88d6708ee96fc98.pdf]

Additional file 5. Frequency distributions of responses for each TBQ+D Item.

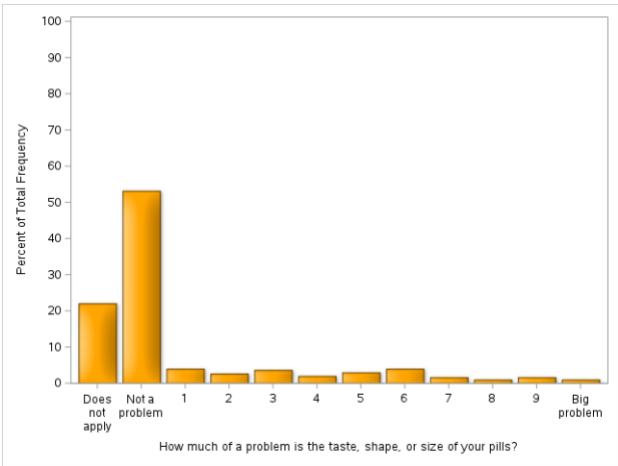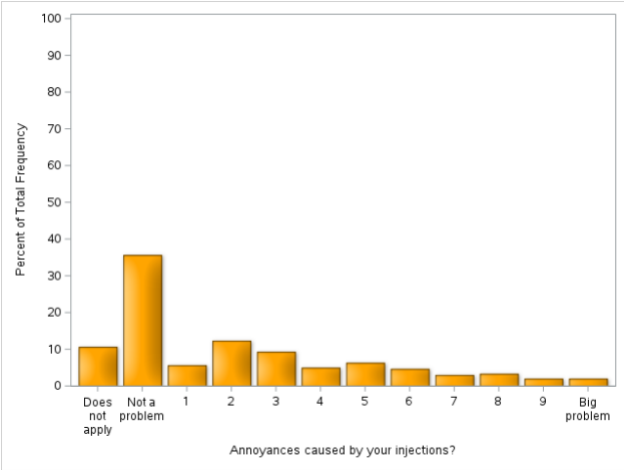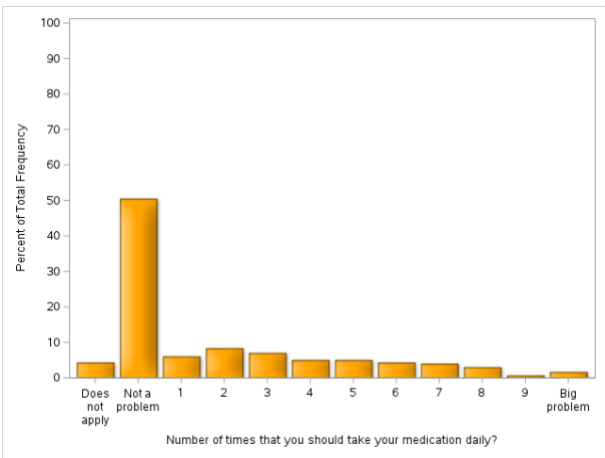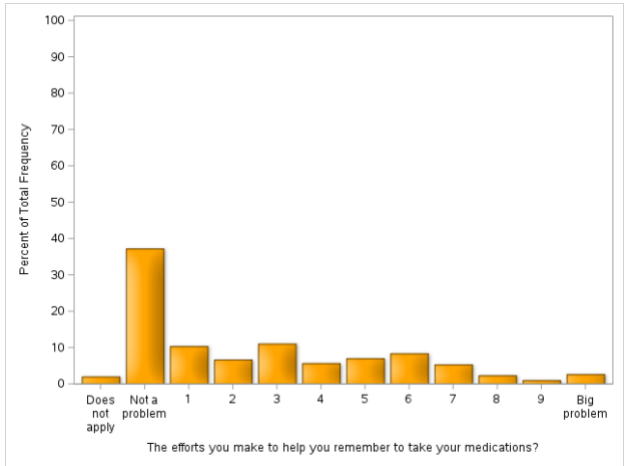

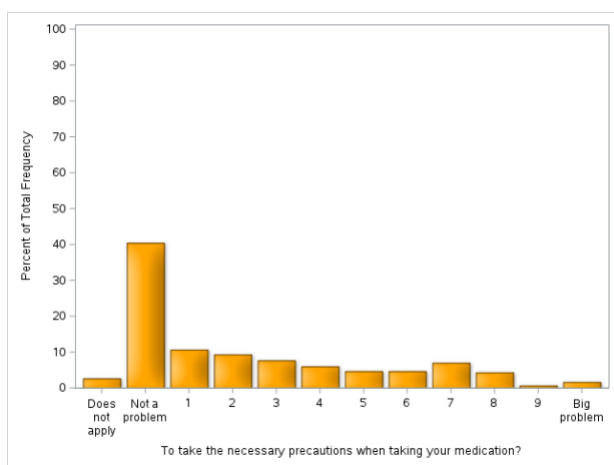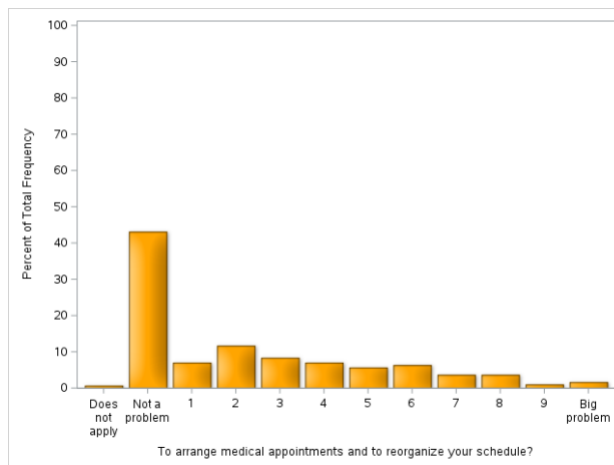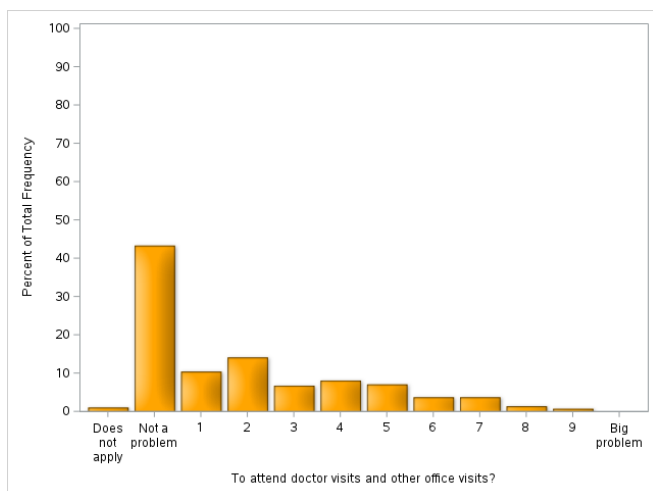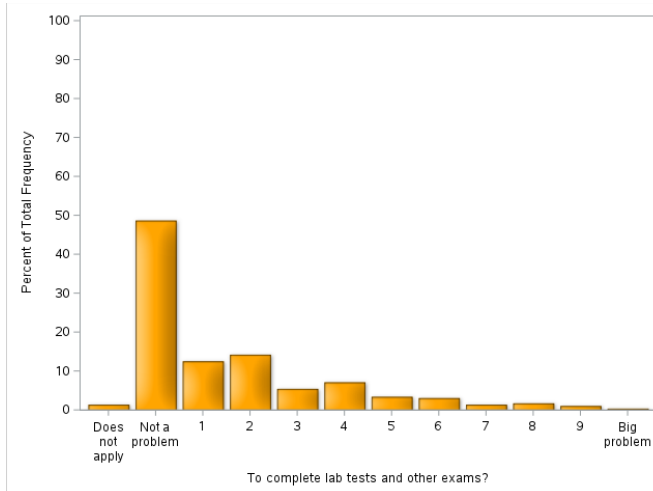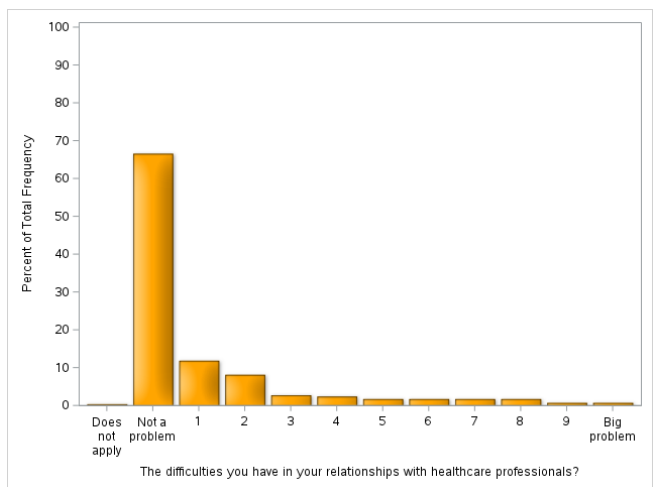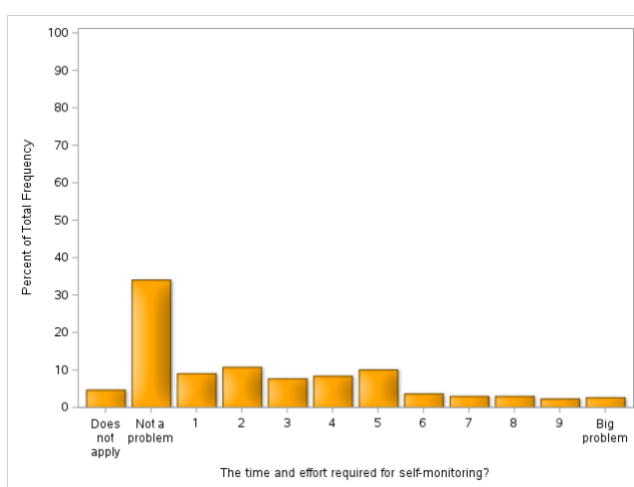

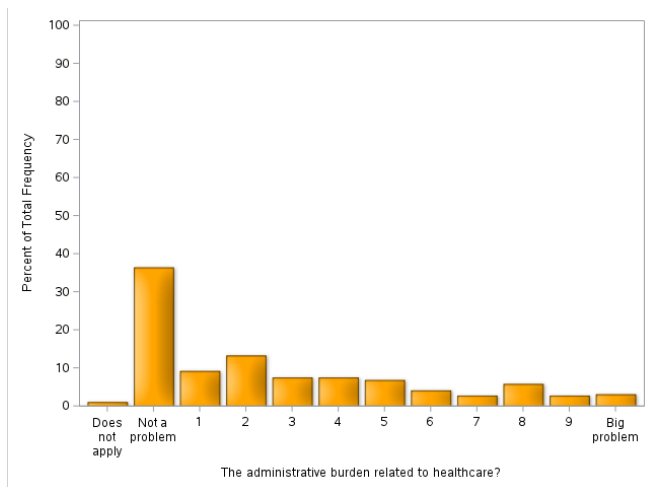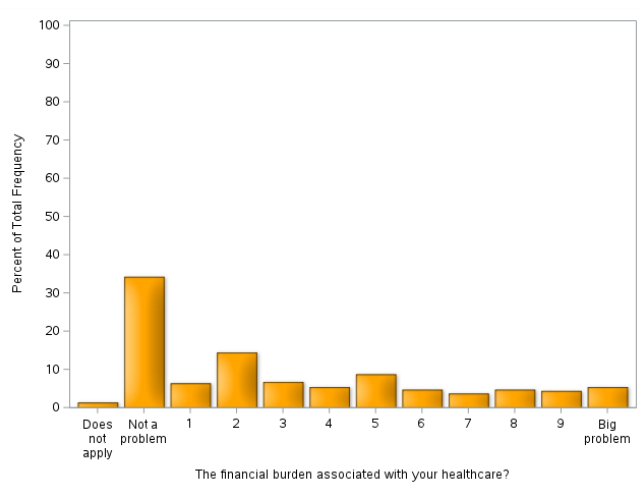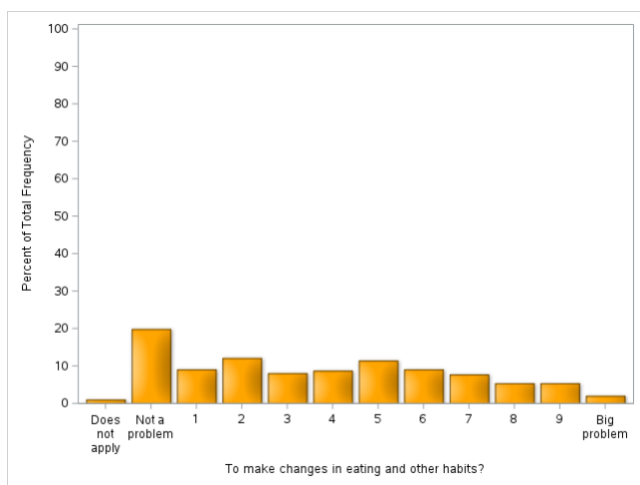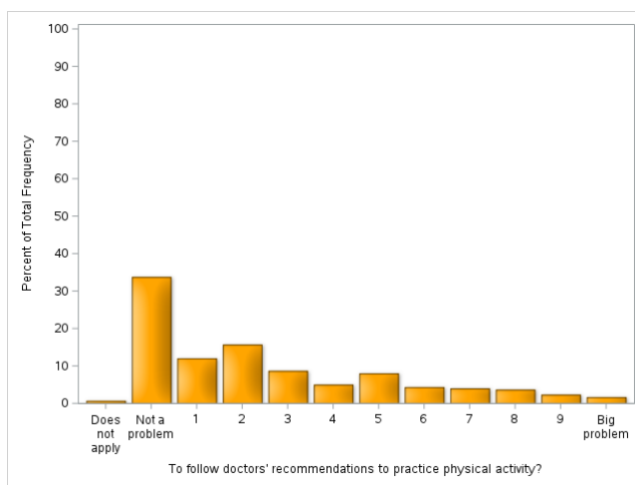

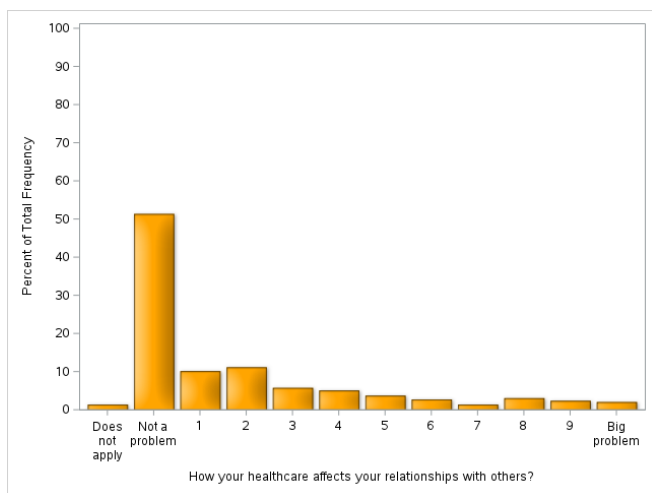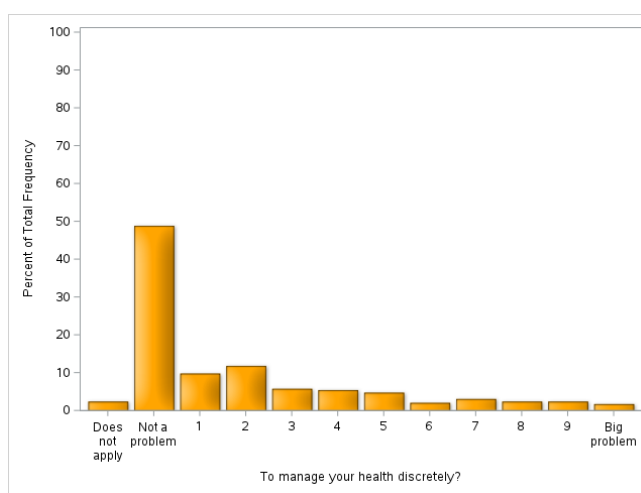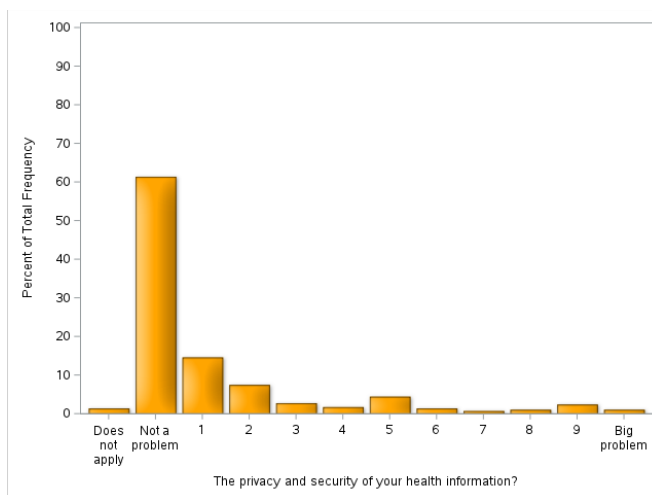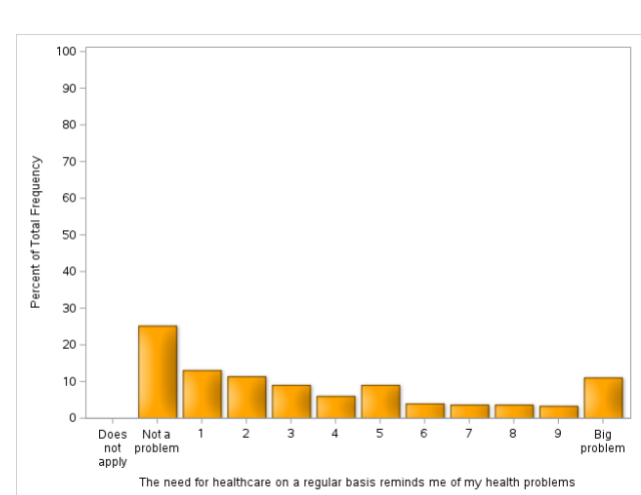

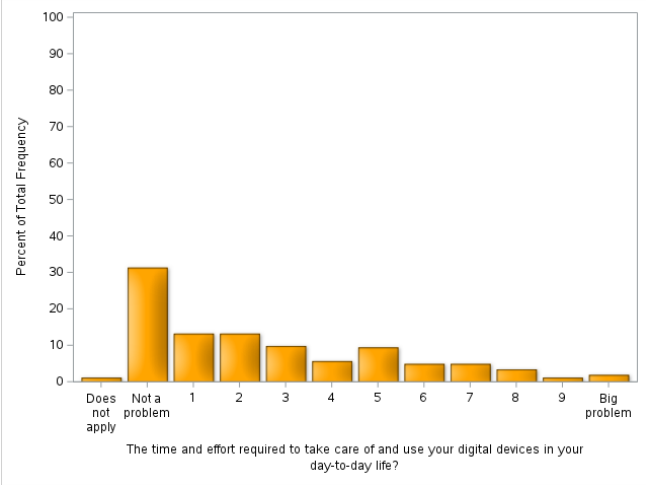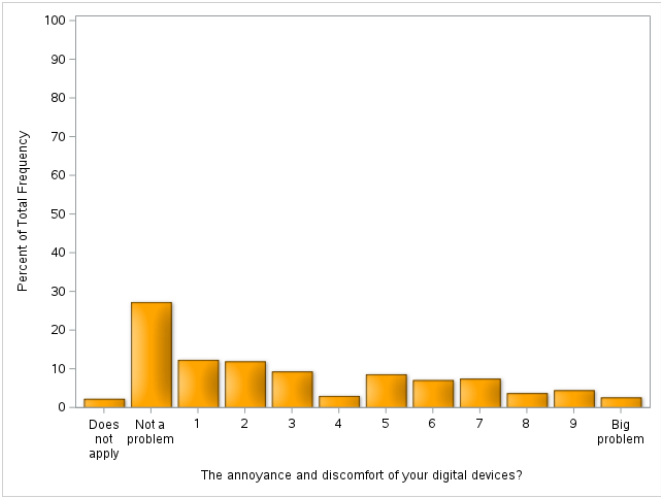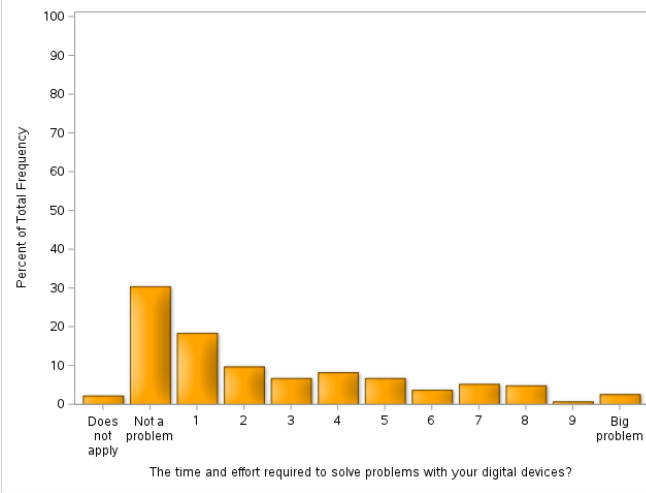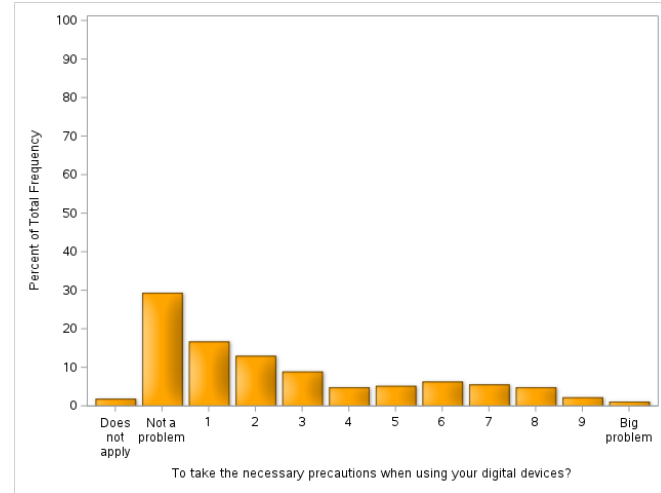

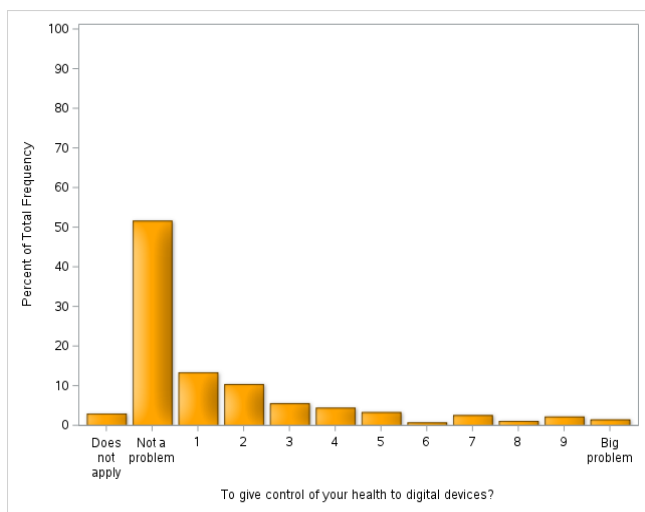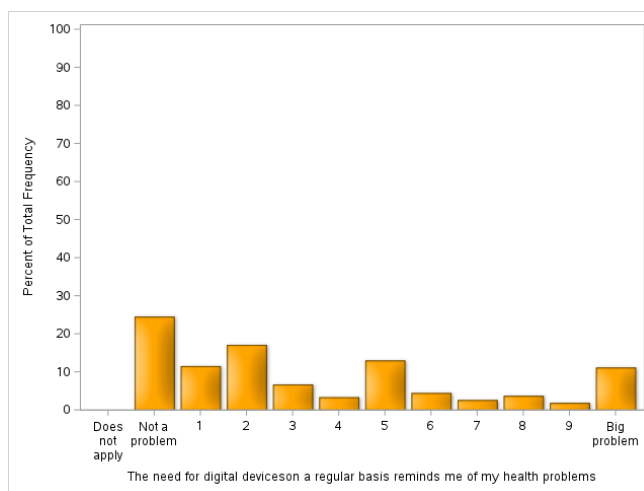

Supplement: Supplementary file 2 [file 6793095e21e7362db95ef43e.pdf]
